# Supplementary material
Source: PubMed Central journal article supplement (PMC9854242)
Supplement: NIHMS1862016-supplement-Supplementary_information.pdf [file NIHMS1862016-supplement-Supplementary_information.pdf]

**Supplementary Table 1. Composition of pipette and bath solutions and liquid junction potentials in experiments with HEK293/HEK293A cells.**

|                                 | NaCl | KCl | LiCl | RbCl | CsCl | NMDG | MgCl <sub>2</sub> | CaCl <sub>2</sub> | HEPES | Glucose | LJP pip. stand |
|---------------------------------|------|-----|------|------|------|------|-------------------|-------------------|-------|---------|----------------|
| <b>Pipette standard</b>         | —    | 130 | —    | —    | —    | —    | 2                 | —                 | 10    | —       | —              |
| <b>Pipette NMDG<sup>+</sup></b> | —    | —   | —    | —    | —    | 130  | 2                 | —                 | 10    | —       | —              |
| <b>Bath Na<sup>+</sup></b>      | 130  | —   | —    | —    | —    | —    | 2                 | 2                 | 10    | 10      | 4.4            |
| <b>Bath K<sup>+</sup></b>       | —    | 130 | —    | —    | —    | —    | 2                 | 2                 | 10    | 10      | 0.2            |
| <b>Bath Li<sup>+</sup></b>      | —    | —   | 130  | —    | —    | —    | 2                 | 2                 | 10    | 10      | 6.7            |
| <b>Bath Rb<sup>+</sup></b>      | —    | —   | —    | 130  | —    | —    | 2                 | 2                 | 10    | 10      | -0.5           |
| <b>Bath Cs<sup>+</sup></b>      | —    | —   | —    | —    | 130  | —    | 2                 | 2                 | 10    | 10      | -0.4           |
| <b>Bath NMDG<sup>+</sup></b>    | —    | —   | —    | —    | —    | 130  | 2                 | 2                 | 10    | 10      | 9.9            |
| <b>Bath Mg<sup>2+</sup></b>     | —    | —   | —    | —    | —    | —    | 65                | 2                 | 10    | 10      | -3.8           |
| <b>Bath Ca<sup>2+</sup></b>     | —    | —   | —    | —    | —    | —    | 2                 | 65                | 10    | 10      | -4.2           |

Abbreviations: HEPES, 4-(2-hydroxyethyl)-1-piperazineethanesulfonic acid; LJP, liquid junction potential; NMDG, N-Methyl-D-glucamine. All concentrations are in mM.

**Supplementary Table 2. Comparison of amino acid residues forming the retinal-binding pockets of *HcKCR1* and red-shifted ChRs.**

|                      | 49       | 53       | 57       | 85       | 89       | 90       | 93       | 115      | 138      | 141      | 142      | 145      | 182      | 185      | 186      | 189      |
|----------------------|----------|----------|----------|----------|----------|----------|----------|----------|----------|----------|----------|----------|----------|----------|----------|----------|
| <b><i>HcKCR1</i></b> | <b>L</b> | <b>I</b> | <b>C</b> | <b>D</b> | <b>T</b> | <b>C</b> | <b>L</b> | <b>L</b> | <b>Y</b> | <b>G</b> | <b>C</b> | <b>F</b> | <b>W</b> | <b>F</b> | <b>P</b> | <b>F</b> |
| Chrimson             | V        | E        | V        | E        | S        | C        | I        | C        | Y        | S        | C        | G        | W        | Y        | P        | W        |
| RubyACRs             | V        | T        | Y        | F        | T        | C        | I        | D        | N        | S        | Y        | C        | Q        | F        | I        | Y        |
| <i>CsCCR</i>         | I        | E        | Y        | G        | T        | T        | I        | N        | F        | G        | C        | M        | W        | F        | P        | W        |
| BR                   | V        | A        | Y        | D        | T        | T        | L        | D        | W        | S        | T        | M        | W        | F        | P        | W        |

Abbreviations: *CsCCR*, *Crustomastix stigmatica* cation channelrhodopsin; BR, bacteriorhodopsin. The numbers are the residue positions in bacteriorhodopsin.

**Supplementary Table 3. Comparison of *HcKCR1* with previously available tools for optogenetic manipulation of K<sup>+</sup> gradients.**

| Name                         | Modality                                                                                                    | Activation | P <sub>K</sub> /P <sub>Na</sub> | Half-saturation light intensity (mW mm <sup>-2</sup> ) | Rise τ (ms) | Decay τ (ms) | Reference  |
|------------------------------|-------------------------------------------------------------------------------------------------------------|------------|---------------------------------|--------------------------------------------------------|-------------|--------------|------------|
| <b><i>HcKCR1_mCherry</i></b> | natural channelrhodopsin                                                                                    | Direct     | 23                              | 0.2*                                                   | 3.6         | 36           | This study |
| <b>BLINK2</b>                | viral K <sup>+</sup> channel K <sub>CV</sub> fused with LOV2 domain                                         | Direct     | 9.3 <sup>#</sup>                | n.d.                                                   | 162,000     | 444,000      | 13,38      |
| <b>SthK-T-YFP-bPAC-Ex</b>    | <i>Spirochaeta</i> K <sup>+</sup> channel fused with <i>Beggiatoa</i> photoactivated adenylyl cyclase       | Indirect   | n.d.                            | 0.5                                                    | 4,000       | 254,000      | 14         |
| <b>SthK-P2A-bPAC_mCherry</b> | <i>Spirochaeta</i> K <sup>+</sup> channel coexpressed with <i>Beggiatoa</i> photoactivated adenylyl cyclase | Indirect   | n.d.                            | 0.85                                                   | 12,000      | 33,000       | 15         |

\*For current at the end of a 200-ms light pulse; <sup>#</sup>determined in natural K<sub>CV</sub>; n.d., not determined.
